# Supplementary material for: Clock-like Mutation Signature May Be Prognostic for Worse Survival Than Signatures of UV Damage in Cutaneous Melanoma
Source: MDPI journal article supplement (doi:10.3390/cancers15153818), 2023-07-27
Supplement: s1 [file s1]

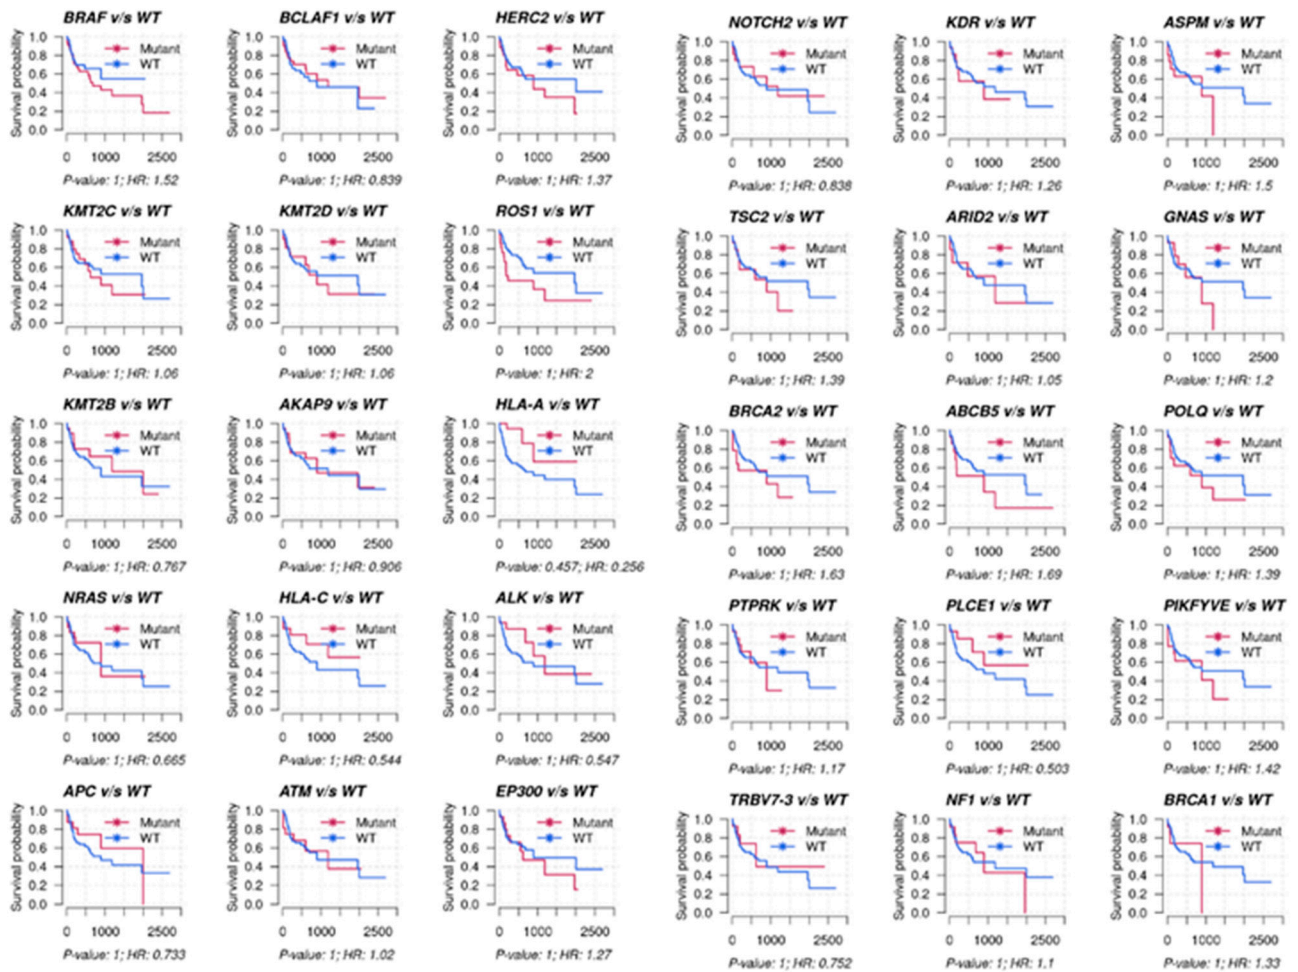

**Figure S1.** Survivorship analyses for single gene mutations in the whole study cohort. The most frequently mutated genes, affected in at least 14 patients. Read from left to right.
